# Supplementary material for: Open E-survey on the Use and Perception of Chatbots in Vascular Surgery
Source: PubMed Central journal article supplement — EJVES Vasc Forum. 2024 Jul 16;62:57–63. doi: 10.1016/j.ejvsvf.2024.07.037 (PMC11437816; doi:10.1016/j.ejvsvf.2024.07.037), 2024-07-16
Supplement: mmc1.pdf [file mmc1.pdf]

## **Appendix A**

Study group collaborators : European Research Collaborative (EVRC)

Florian Enzmann, Gert J. de Borst, Joel Ferreira Sousa, Lewis Meecham, Liliana Domingos, Martin Teraa, Petar Zlatanovic, Salome Weiss, Stefano Ancetti, Albert Busch, Bergrós Jóhannesdóttir, Alexander Gombert, Katariina Noronen, Robert Hinchliffe, Alexandru Predenciuc, Panagiotis Doukas, Leszek Kukulski, Qasam Ghulam, Angelos Karelis, Maram Darwish, Mohammad Esmaeil Barbati, Markvard Møller, Matt Spreadbury, Willemien van de Water, Desiree van den Hondel, Harm Ebben, Alexander Croo, Gilles Uijtterhaegen, Adina Trusca, Ryan Gouveia Melo, Vaiva Dabravolskaite, Paolo Spath, Vishal Amlani, Aoife Kiernan, Christian Zielasek
